# Supplementary material for: Ventral Nerve Cord Dissection and Microscopy ofDrosophilaEmbryos
Source: HighWire-hosted journal article supplement (doi:10.1101/pdb.prot108117), 2023-07-07
Supplement: Supplemental_Movies_Legend.docx [file Supplemental_Movies_Legend.docx]

Supplemental Movies S1–S3. *Drosophila* embryo ventral nerve cord dissection. Video demonstration of ventral nerve cord dissection from fixed and stained *Drosophila* embryos as described in the protocol. Embryos developed with horseradish peroxidase (HRP) immunohistochemistry can be dissected under white light (Supplemental Movies S1 and S2). Embryos stained with fluorescent antibodies can be dissected under epifluorescence illumination, which allows the nerve cord staining to be visualized while dissecting (Supplemental Movie S3).
